# Supplementary material for: A light-driven three-dimensional plasmonic nanosystem that translates molecular motion into reversible chiroptical function
Source: PubMed Central journal article supplement (PMC4740900; doi:10.1038/ncomms10591), 2016-02-02
Supplement: ncomms10591-s1.pdf [file ncomms10591-s1.pdf]

## Supplementary Information

### A light-driven three-dimensional plasmonic nanosystem that translates molecular motion into reversible chiroptical functions

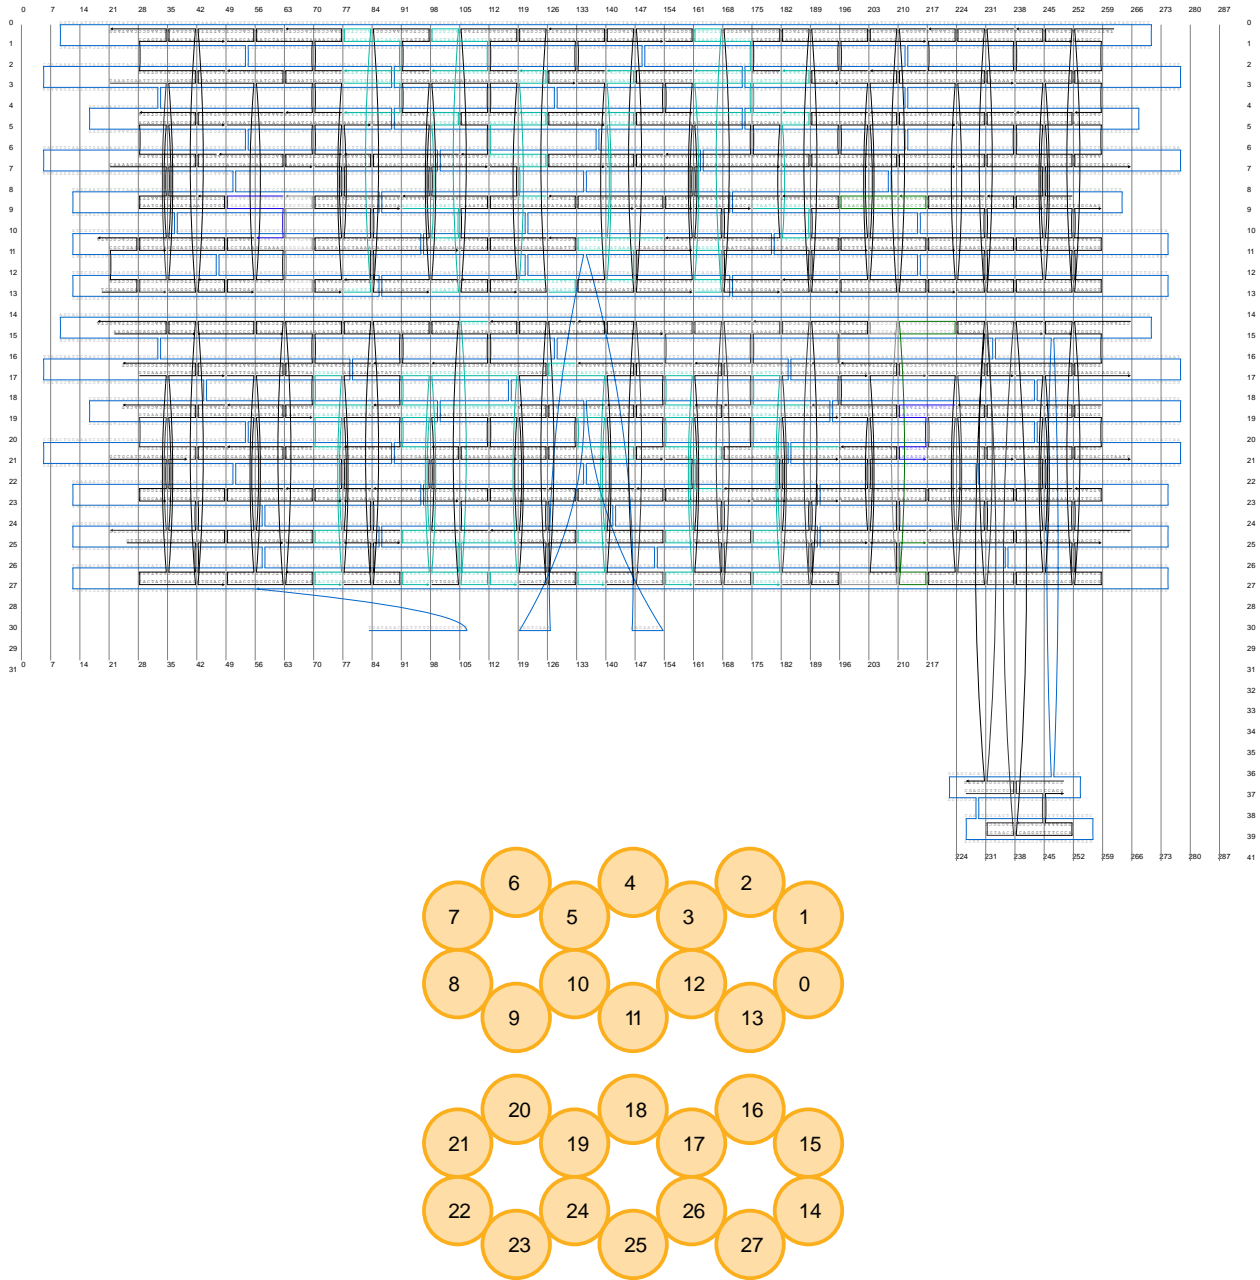

Supplementary Figure 1. Strand routing diagram of the DNA origami template.

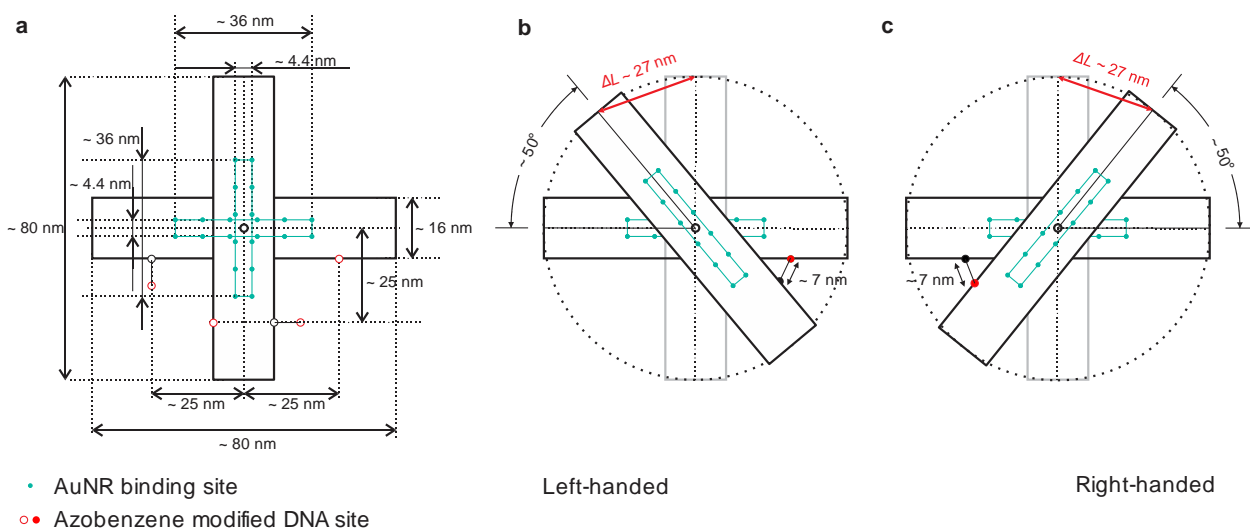

**Supplementary Figure 2. Schematics of the DNA origami template.**

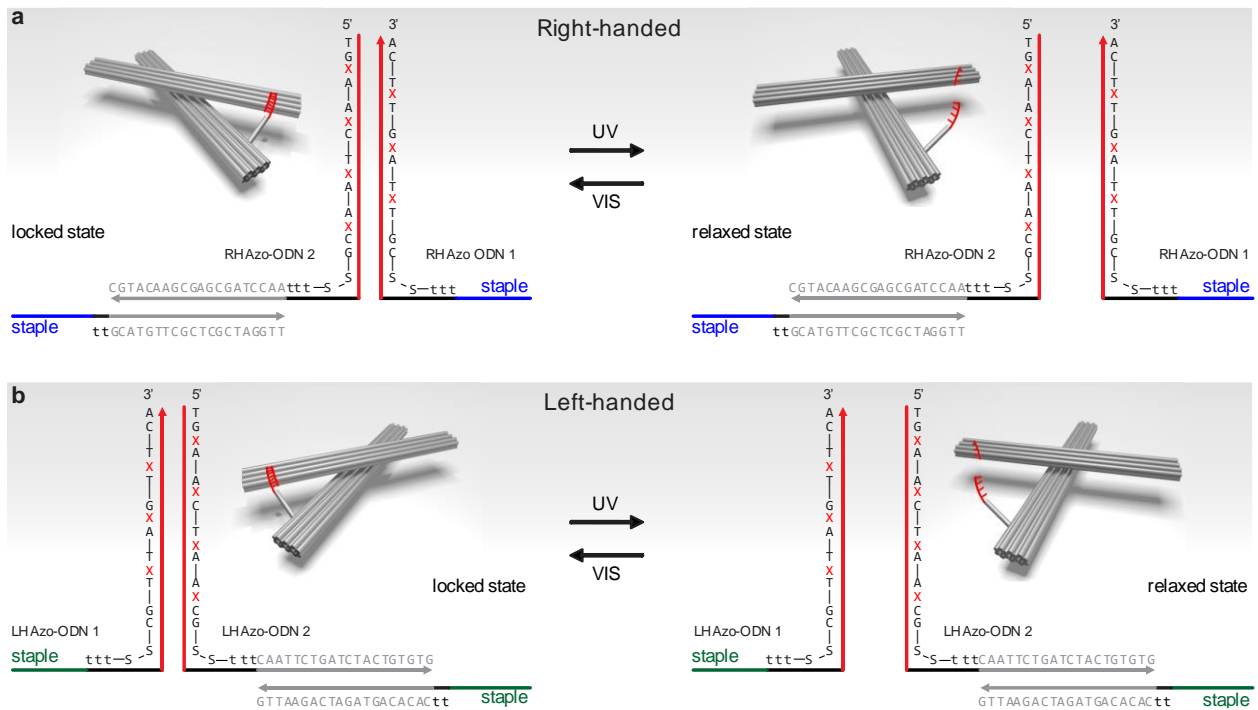

**Supplementary Figure 3. DNA sequences used for switching of the DNA origami template. a**, Switching between the relaxed and the right-handed states. **b**, Switching between the relaxed and the left-handed states. In the relaxed state, the two bundles of the DNA origami are not linked by the azo-modified strands. Hybridization of the Azo-modified DNA strands (Azo ODN 1 and Azo ODN 2) results in the locking of the template into a configuration with well-defined handedness.

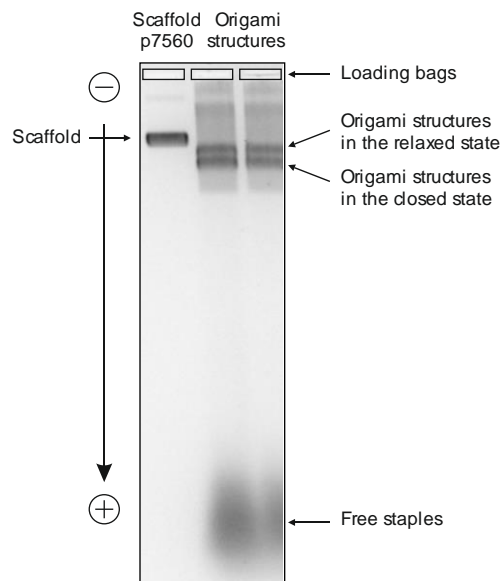

**Supplementary Figure 4. Purification of DNA origami by agarose gel electrophoresis.** Inverted photograph of a Sybr Gold stained 2.5% agarose gel under blue light (460 nm) illumination. The left lane contains the p7560 ssDNA scaffolds and the two right lanes contain the DNA origami structures after thermal annealing.

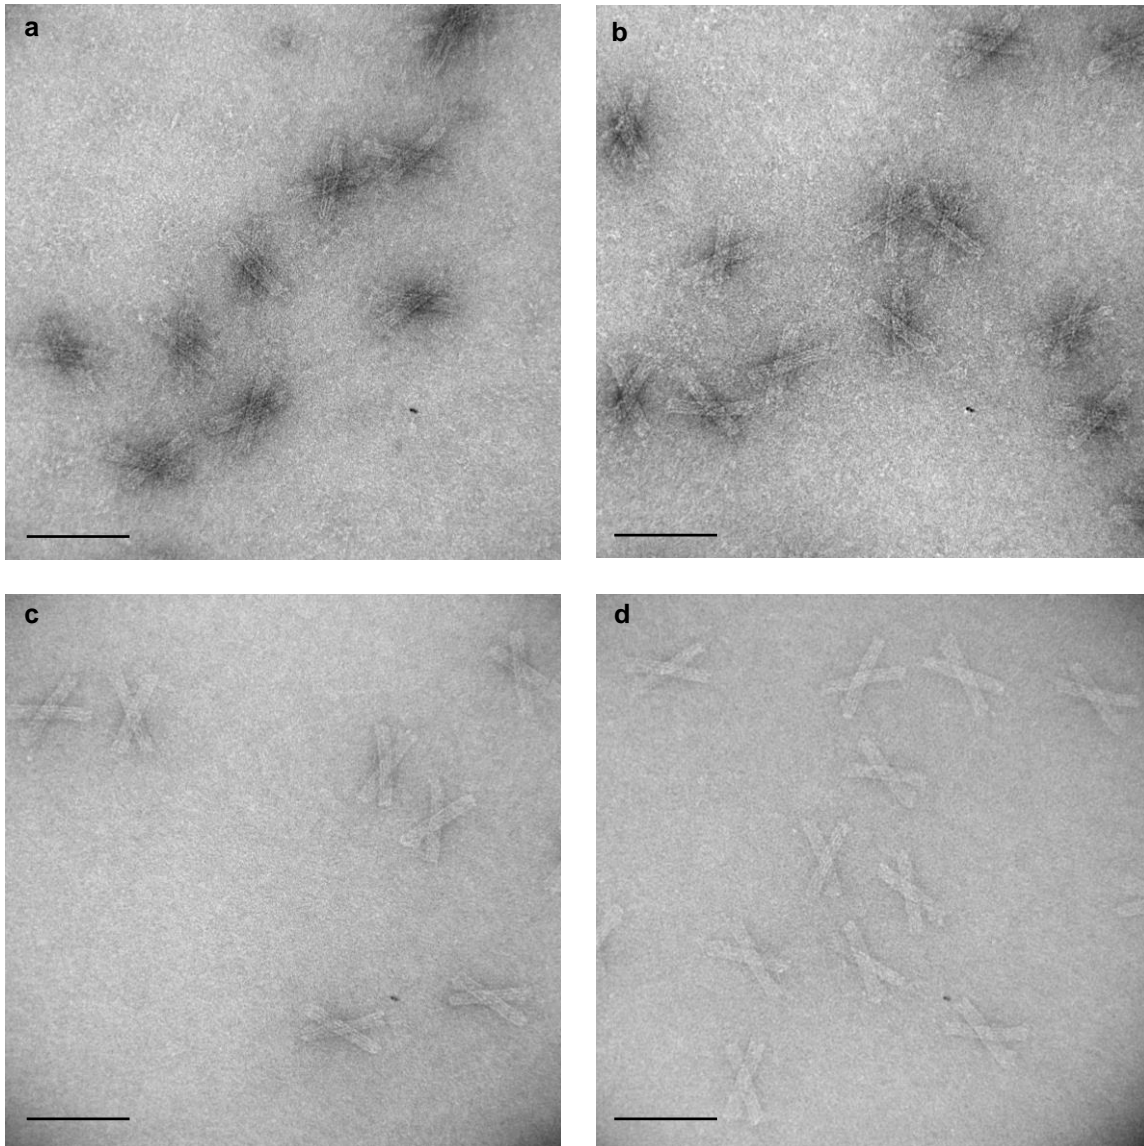

**Supplementary Figure 5. DNA origami templates in the closed state after the gel purification. Right-handed structures (a, b) and left-handed structures (c,d). Scale bars: 100 nm.**

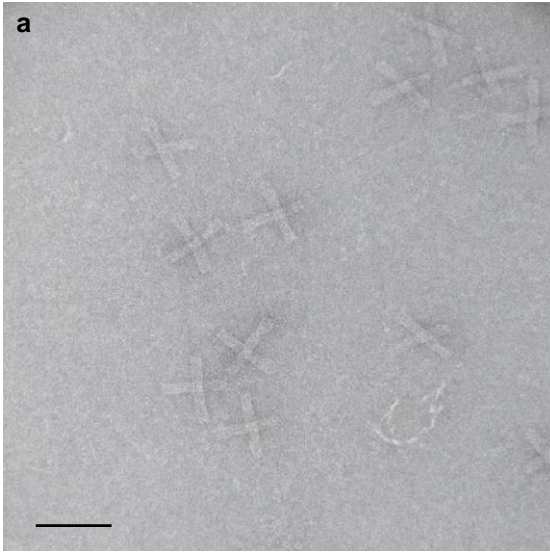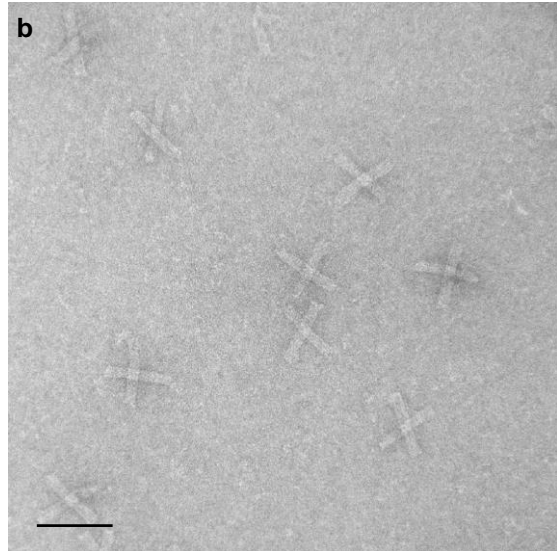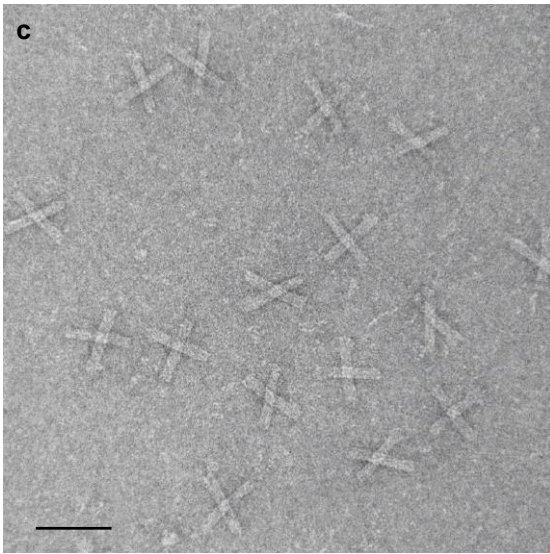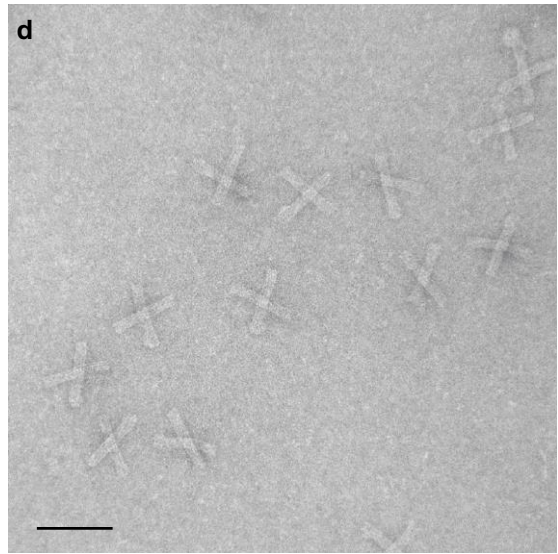

**Supplementary Figure 6. Right-handed DNA origami templates in the relaxed state after UV illumination. Scale bars: 100 nm.**



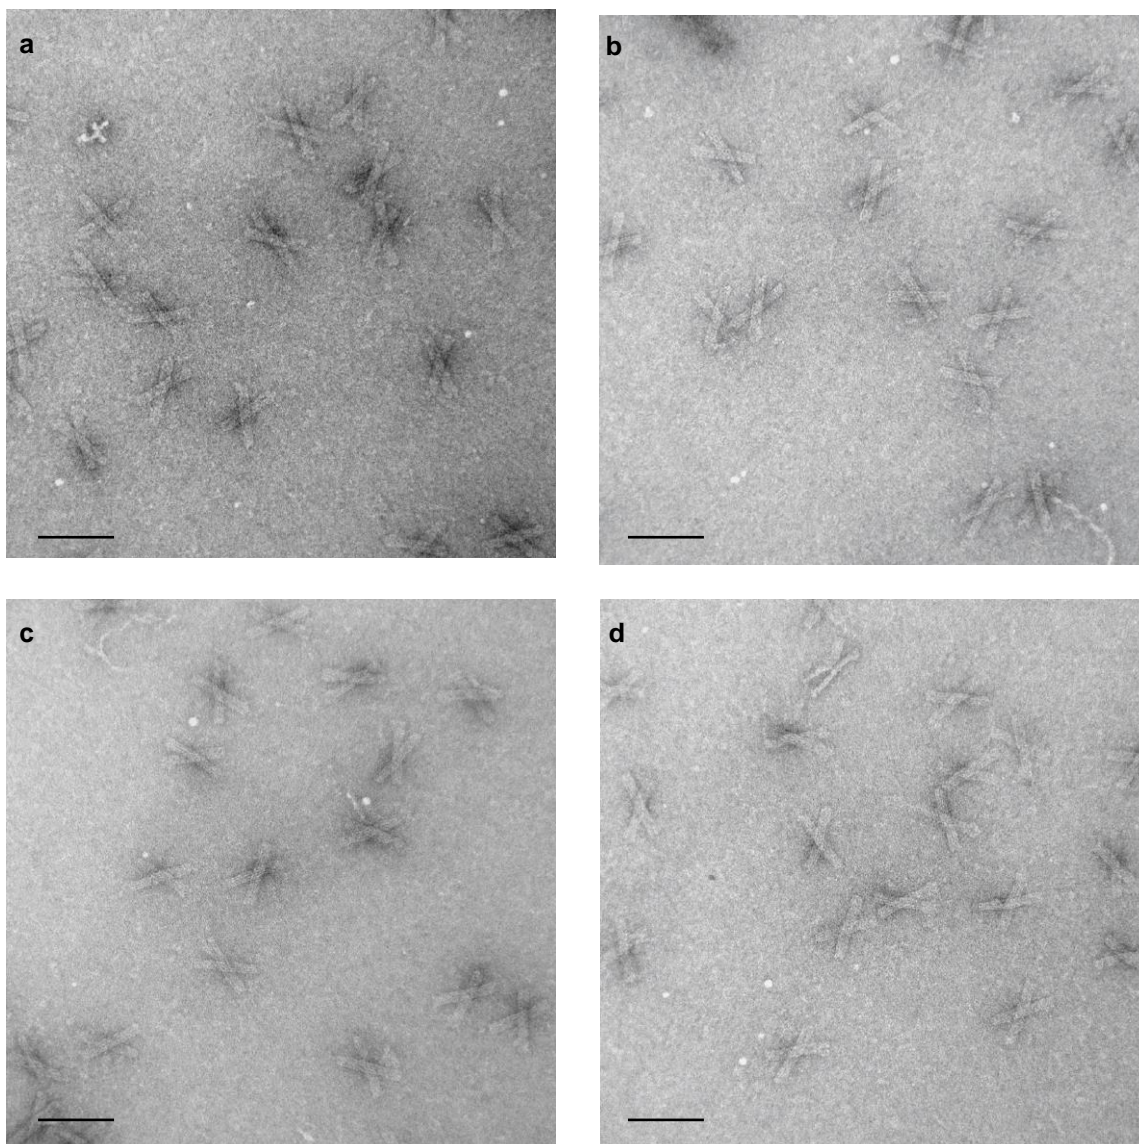

**Supplementary Figure 7. Right-handed DNA origami templates in the locked state after VIS illumination. Scale bars: 100 nm.**

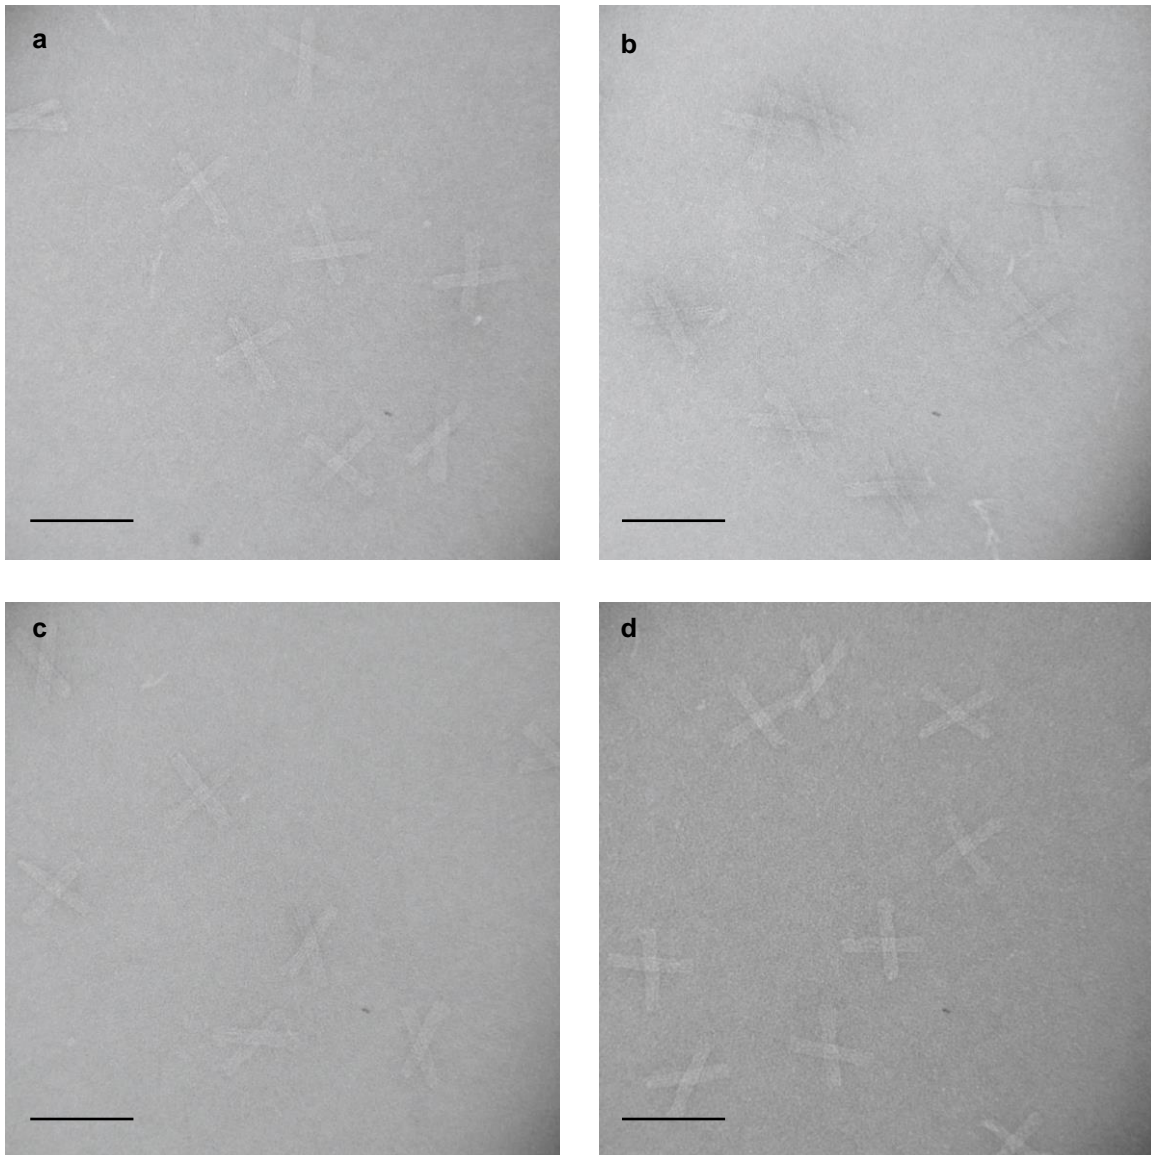

**Supplementary Figure 8. Left-handed DNA origami templates in the relaxed state after UV illumination. Scale bars: 100 nm.**



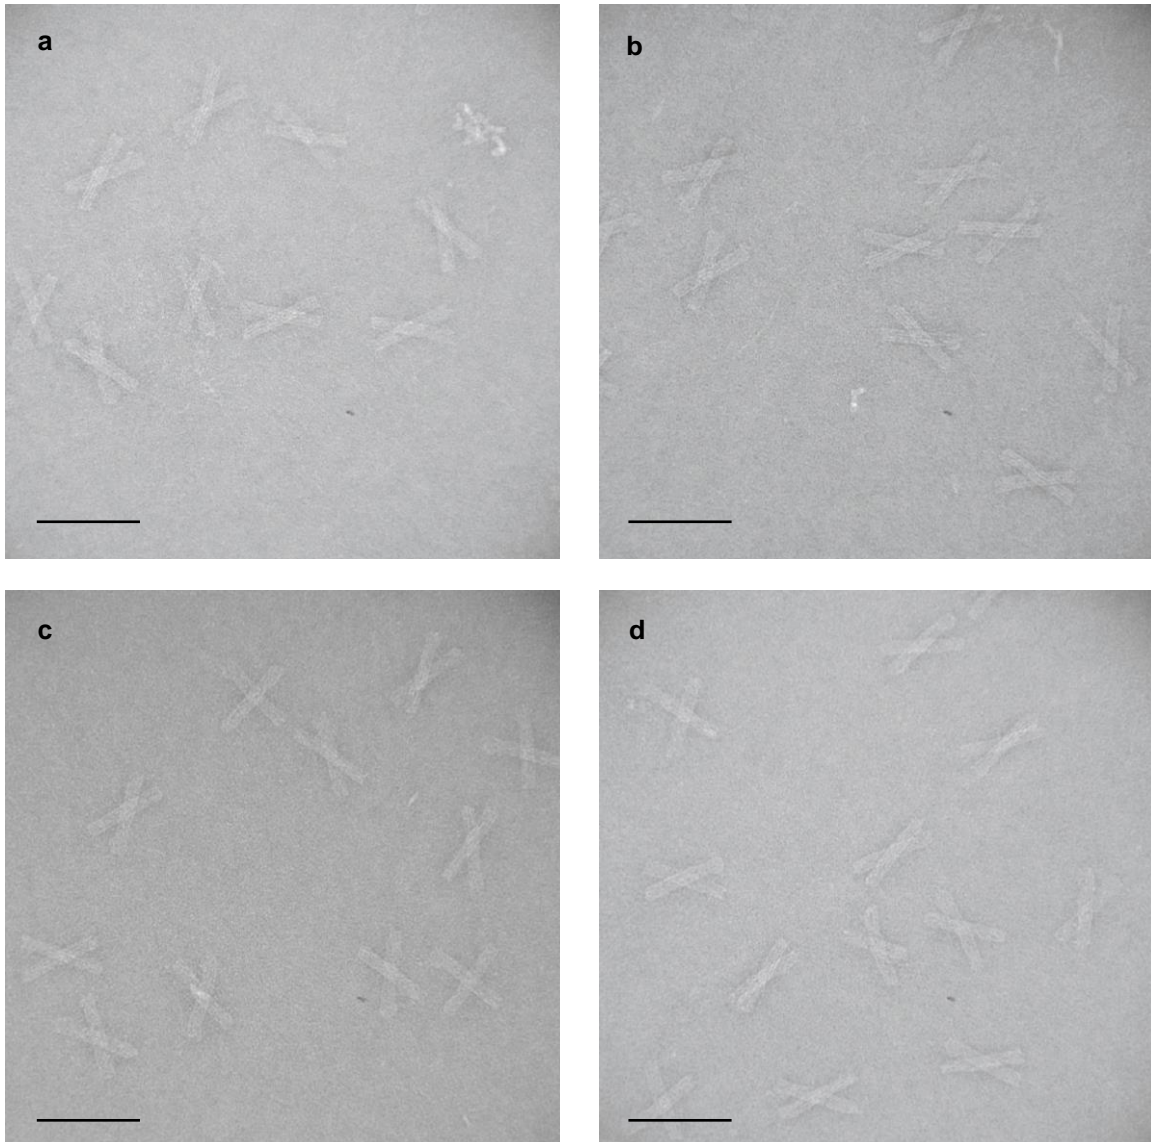

**Supplementary Figure 9. Left-handed DNA origami templates in the locked state after VIS illumination. Scale bars: 100 nm.**

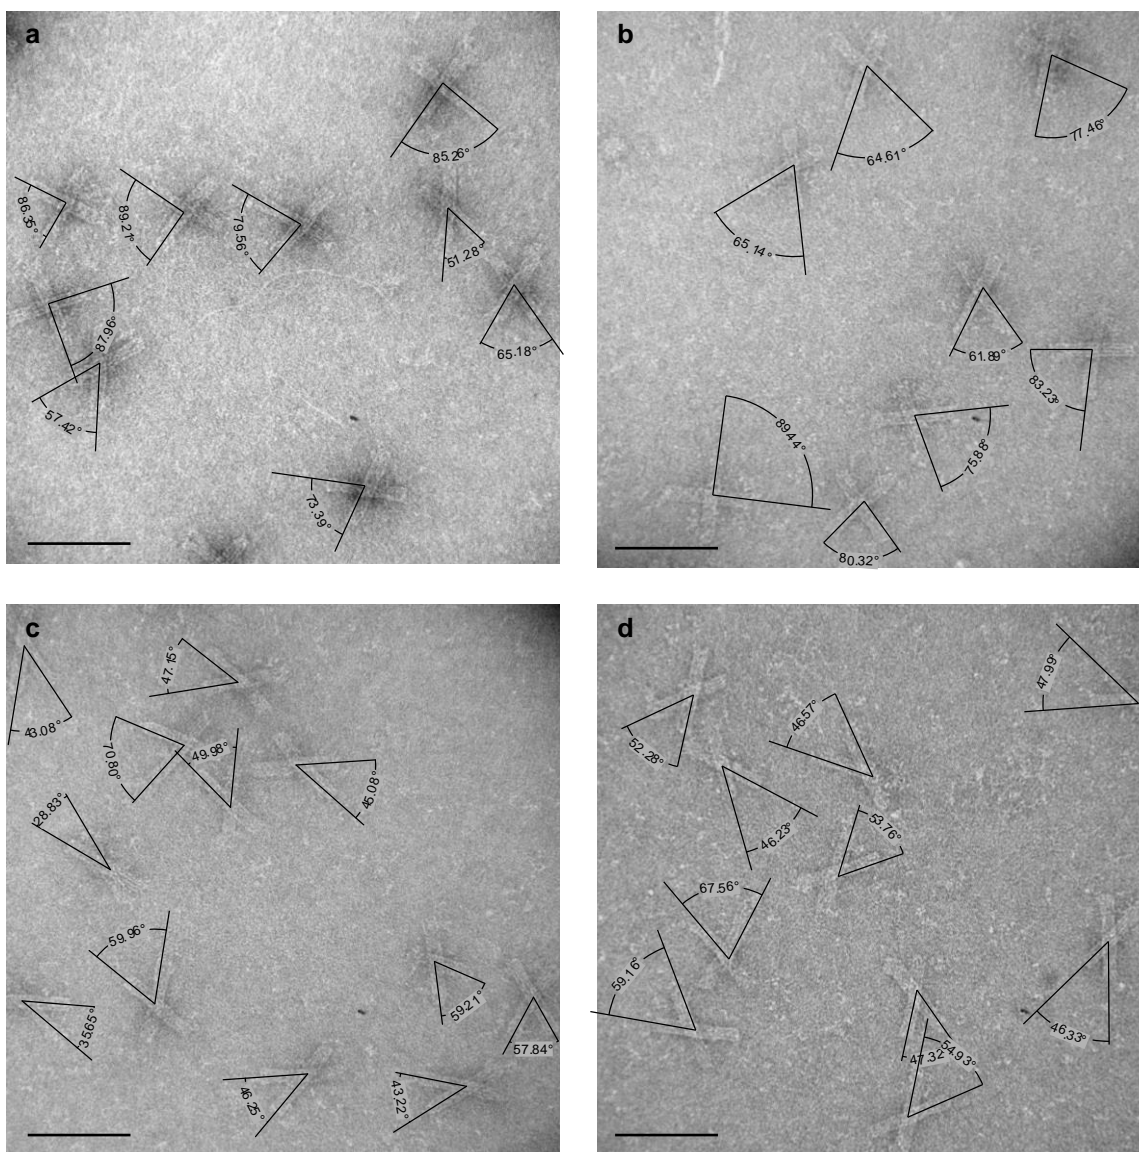

**Supplementary Figure 10. Examples of the acute angle characterization.** Right-handed structures after UV (a,b) and VIS light illumination (c,d). Scale bars: 100 nm.

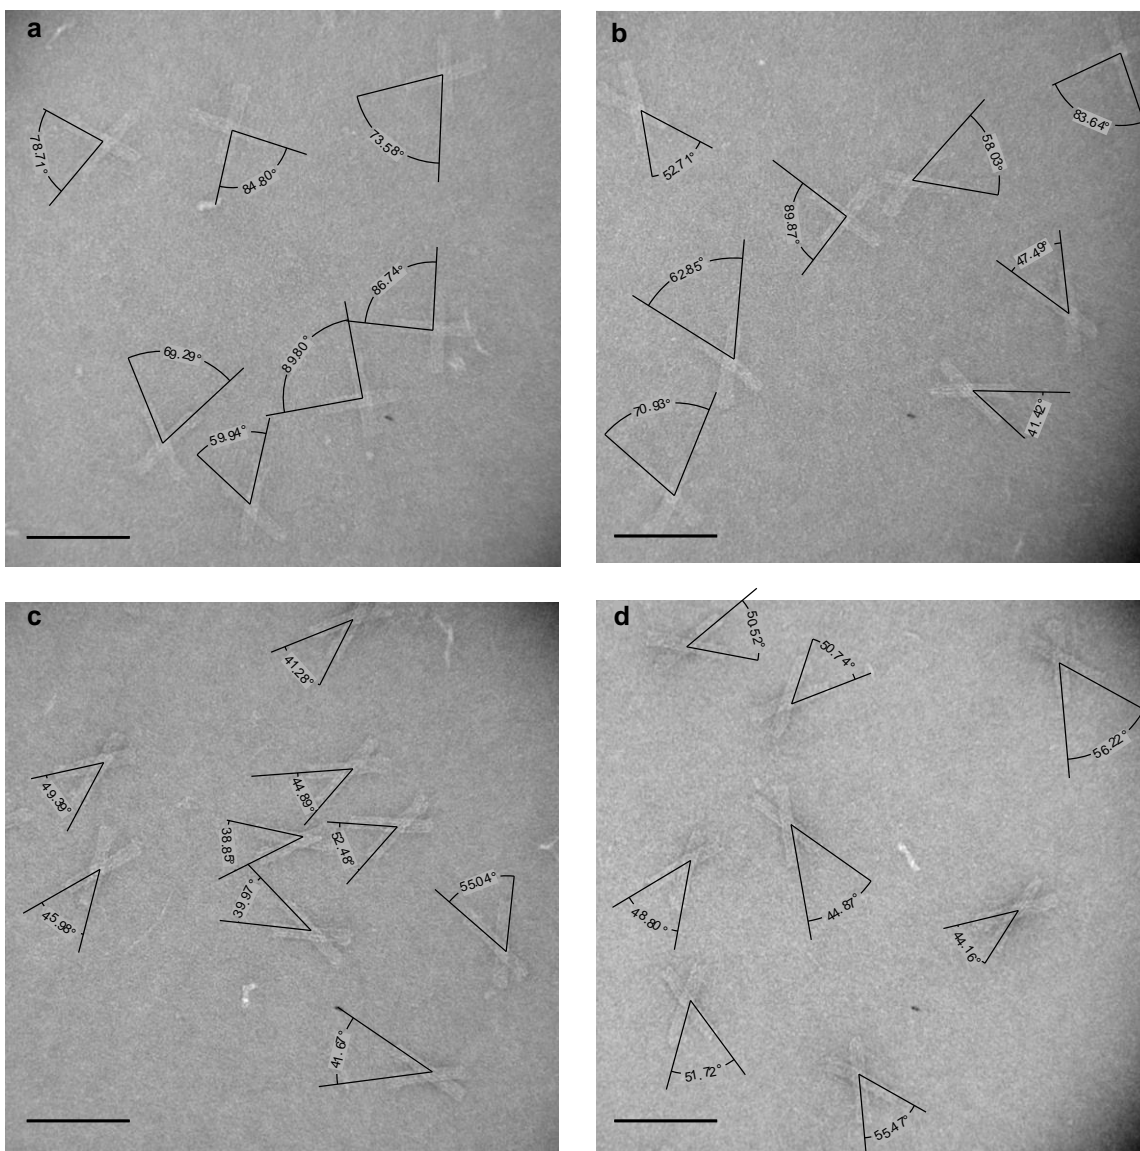

**Supplementary Figure 11. Examples of the acute angle characterization.** Left-handed structures after UV (a,b) and VIS light illumination (c,d). Scale bars: 100 nm.

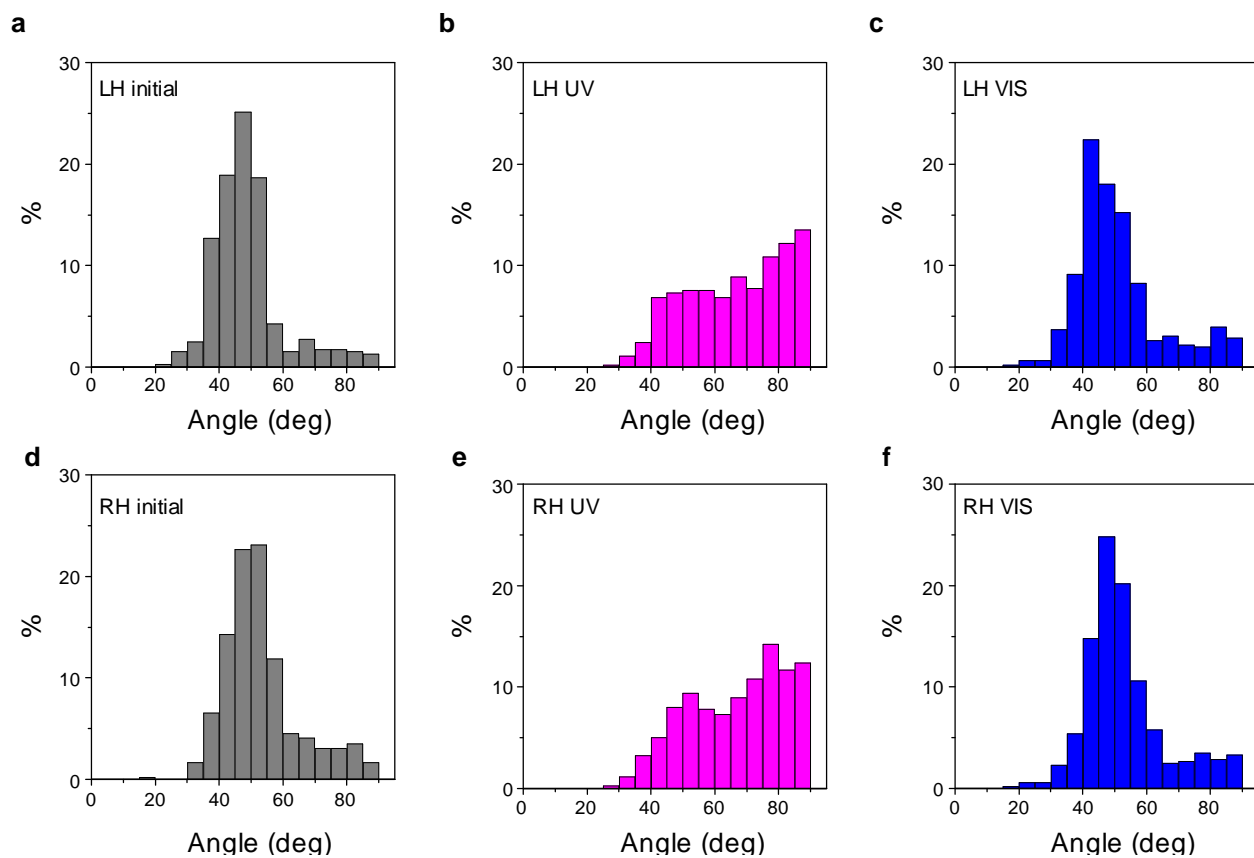

**Supplementary Figure 12. Acute angle distributions.** The left-handed DNA origami templates after assembly and purification (a), UV (b), and VIS light illumination (c). The right-handed DNA origami templates after assembly and purification (d), UV (e), and VIS light illumination (f). The number of analyzed structures: 402 (a), 452 (b), 460 (c), 510 (d), 463 (e), 541 (f).

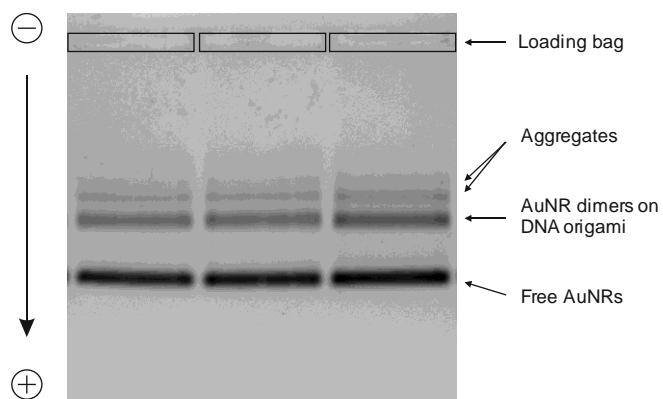

**Supplementary Figure**

**plasmonics nanostructures.** White light image of a 0.5% agarose gel. AuNR dimers are separated from the excess of AuNRs and AuNR-DNA origami aggregates. The lowest broad dark band represents the excess of the AuNRs, which run fastest, followed by the AuNR dimer band and the bands containing aggregates of the DNA origami template structures and AuNRs.

**13. Purification of**



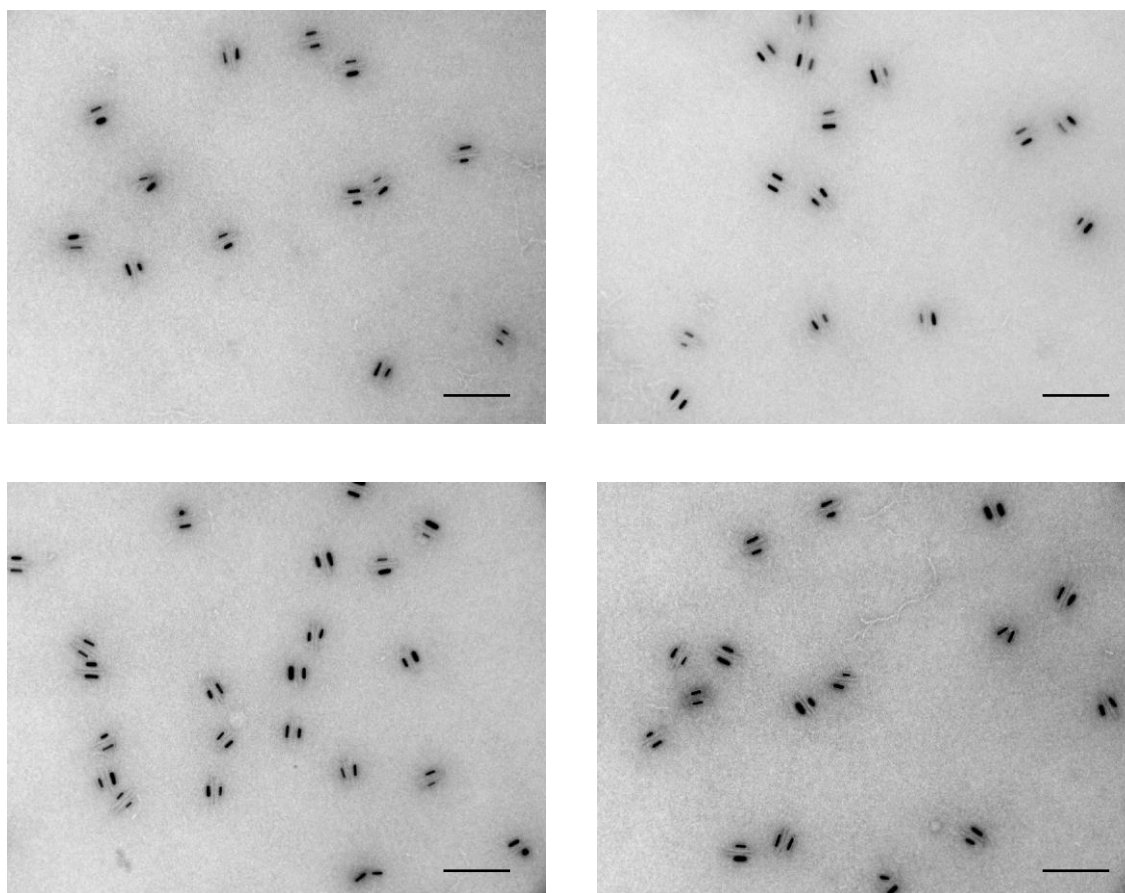

**Supplementary Figure 14. Wide-field TEM images of the assembled AuNR dimers. Scale bars: 200nm.**

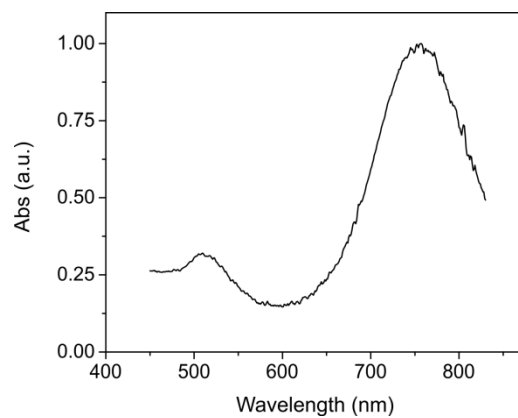

**Supplementary Figure 15. Normalized UV-Vis absorption spectrum of the AuNRs functionalized with thiolated DNA after purification.** The shorter wavelength resonance around 512 nm corresponds to the transverse plasmonic mode of the AuNRs, in which the plasmons are excited along the width of the AuNRs. The longer wavelength resonance around 755 nm corresponds to the longitudinal plasmonic mode of the AuNRs, in which the plasmons are excited along the length of the AuNRs.

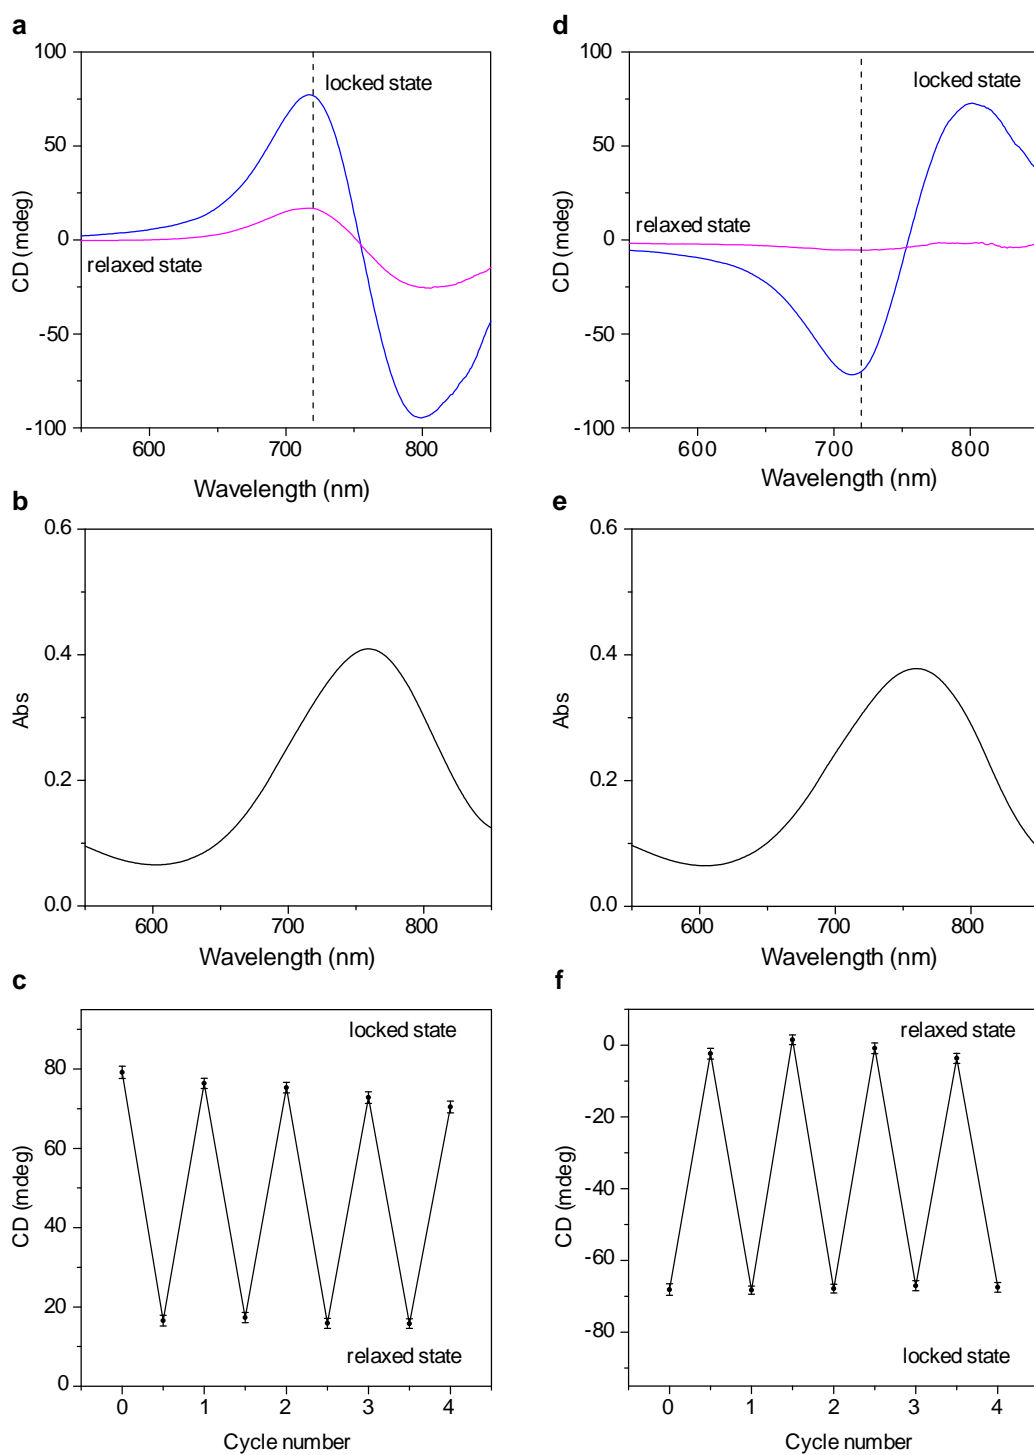

**Supplementary Figure 16. Optical characterizations of the light-driven left- and right-handed plasmonic structures.**

**a**, CD spectra of the left-handed plasmonic structures. **b**, Absorption spectrum of the left-handed plasmonic structures in the relaxed state. **c**, CD intensity recorded at 720 nm (dashed line in **a**) during alternative UV and VIS light illumination in multiple cycles. **d**, CD spectra of the right-handed plasmonic structures. **e**, Absorption spectrum of the right-handed plasmonic structures in the relaxed state. **f**, CD intensity recorded at 720 nm (dashed line in **d**) during alternative UV and VIS light illumination in multiple cycles. The error bars represent one standard deviation from the mean.

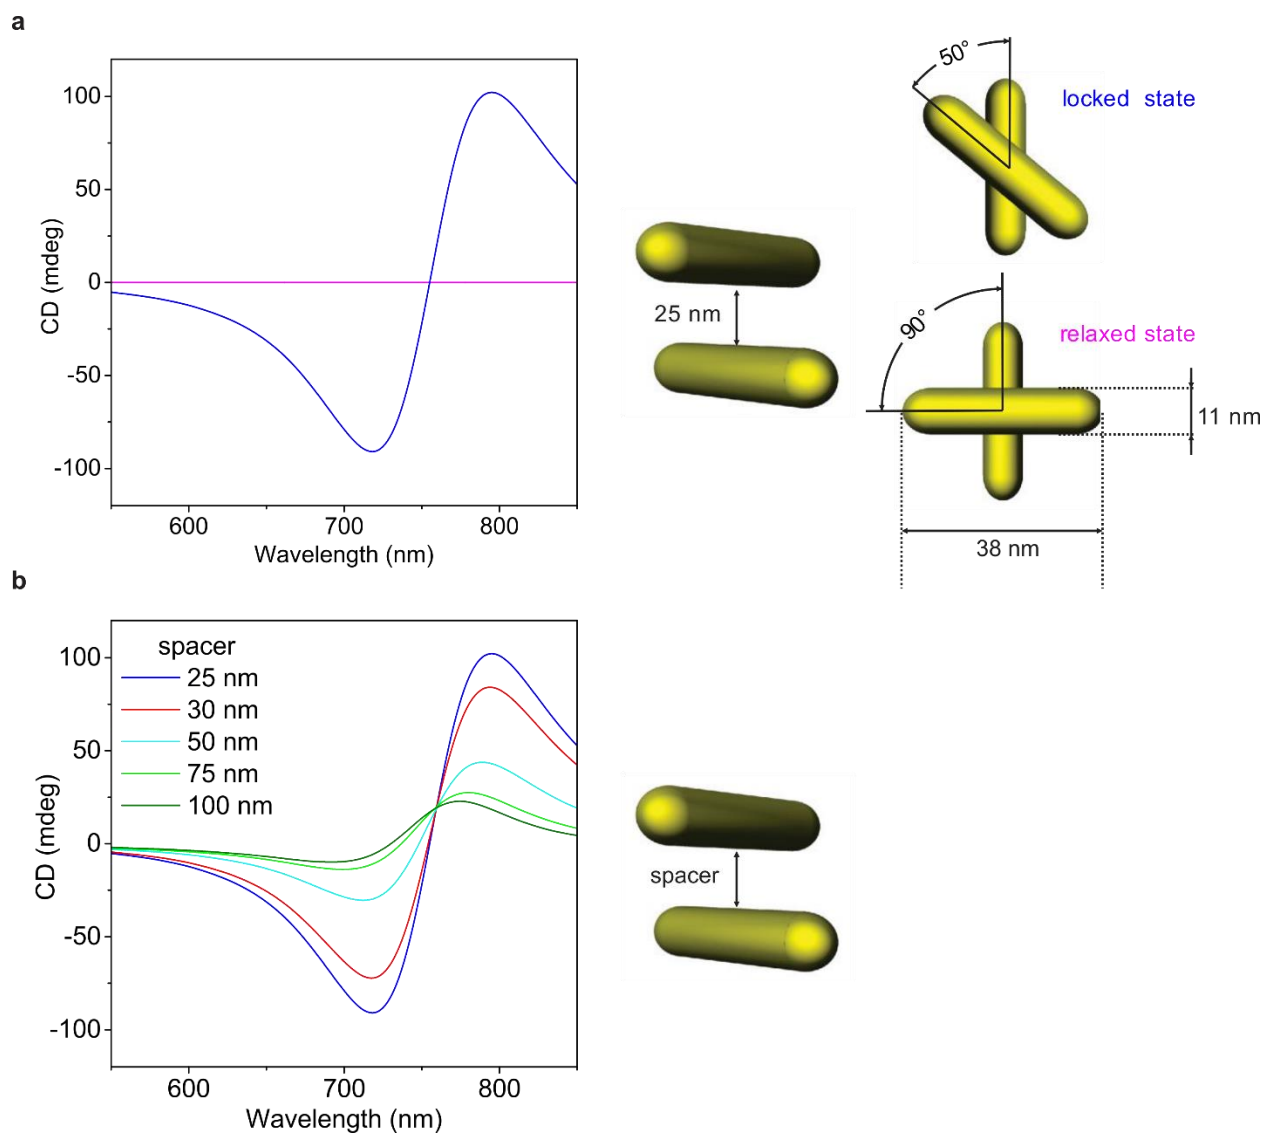

**Supplementary Figure 17. Calculated CD spectra of the crossed AuNR dimers. a**, CD spectra for the locked (right-handed) and the relaxed states. The calculations were carried out with the following parameters; AuNRs: 38 x 10 nm, surface to surface interparticle separation: 25 nm. **b**, CD dependence on the interparticle distance between the rods (in the right-handed configuration). The CD amplitude decreases as the interparticle distance increases.

**Supplementary Table 1. Staple sequences of the DNA origami template.**

| Staples                                           | Length (nt) |               | Start   | End     |
|---------------------------------------------------|-------------|---------------|---------|---------|
| AACGAGCGTCTTTCGCCATATTTGTTTAGAAGCGCATTAGAC        | 42          | "core" staple | 4[202]  | 7[202]  |
| AGGTTTAACGTCGACACCGCCTGGAAGGGTTAGAAGATTTTC        | 42          | "core" staple | 22[62]  | 22[63]  |
| TACTTTTTCTAATCTATTTACAGAAAGGTGCCTGAAACAGTGAGGCCAC | 49          | "core" staple | 15[196] | 25[202] |
| AAGAAGTCCAAAATTAGAGAGCCTTAATT                     | 28          | "core" staple | 4[118]  | 13[118] |
| TTGAGATGTTTTATAATCGCATTGCG                        | 28          | "core" staple | 19[196] | 23[195] |
| AATTTTAATTTTCAGCAAGGCAAAGAAT                      | 28          | "core" staple | 26[146] | 16[133] |
| TCGACAAATTATCAGTCAATATAGTCTGAGAGACGTGAATTACGAATA  | 49          | "core" staple | 25[119] | 14[112] |
| ACTCGTCAATCGGAGAGTAACCTCGTATGAGCACTGGAAGGTAACCTCA | 49          | "core" staple | 14[132] | 22[126] |
| CTCATAATGTTTAGACACCCCCAGCGATAAGAGGA               | 35          | "core" staple | 5[84]   | 9[90]   |
| CATAACCTTATTACCCCTCAGAACC GCCCAGGTCATTTTTG        | 42          | "core" staple | 2[97]   | 13[97]  |
| CCGGCTTAGACGCTCGGCTGACGCATTTCCAAATGAGCGGATGGAGGA  | 49          | "core" staple | 16[97]  | 25[90]  |
| TGTCCATCACGCAAATTAACTTTTAGACAATAGGAACCCGTCGGCAAAT | 49          | "core" staple | 25[217] | 22[224] |
| AATTAATTTTCCCTCCTCGTGTGGTGTGGACT                  | 35          | "core" staple | 15[42]  | 27[48]  |
| AGGGAGCGCCATCTAAGCCTCAGAGCA                       | 28          | "core" staple | 27[140] | 15[153] |
| GTCAATACTAACTTTTTCAAATTAACACGCAAATGAAAAATC        | 42          | "core" staple | 24[104] | 21[118] |
| TATTCTGAAATAAAGGTGGAATAAATTGAGGTTAAAGGTAGCAAG     | 45          | "core" staple | 0[261]  | 9[258]  |
| TATACTTAGATACATTTTCATCACAGAGGTCACCTGCAGACA        | 42          | "core" staple | 18[139] | 21[139] |
| GGCAATTTTCTGAATAATGGCAGTTACAAAATTAATTACAT         | 42          | "core" staple | 25[63]  | 18[49]  |
| GAGATTTACCTAAAACGAAAGGCCACTAAATCATTTTGGGAAGAATTCC | 49          | "core" staple | 10[55]  | 2[49]   |
| CCAAAGAAGAAAATACAAACAAGGTAATAAGTTCAGTGCCTCAAGAG   | 49          | "core" staple | 11[224] | 0[217]  |
| GTGGTTGTGGGAAGGGAAACCAGGCAAA                      | 28          | "core" staple | 15[252] | 17[265] |
| CATACAGTTTGGGGAGTATCATAATGGTGAACCACTGAATGG        | 42          | "core" staple | 16[153] | 21[153] |
| AACCGCCGAGGCAGGTCAGACGATTGACCACGCCACCTCAG         | 42          | "core" staple | 5[224]  | 5[223]  |
| GTTTGATGGTGGTCCGTAGCCCGTGTATCCTGTAATCTCCCCGGT     | 49          | "core" staple | 25[25]  | 16[24]  |
| AACGGCTAGGGATAAAACTACAACGCCT                      | 28          | "core" staple | 13[35]  | 1[48]   |
| GGAGGTTACCCTCAACCACGTAGCGCGTTTTTCATATCGATAAGCACCA | 49          | "core" staple | 4[237]  | 9[244]  |
| CGAGTAAGTAATAAAGGGTGATATTTTAAATGCAA               | 35          | "core" staple | 25[203] | 16[196] |
| AGAATCCAAATCAGTTGTAACGTTAATCCCCAAAACCTAGCATGTCAA  | 49          | "core" staple | 24[216] | 20[196] |
| ACCATCACACATAAGATAGCTTAGATTAAGGTTGG               | 35          | "core" staple | 27[77]  | 16[84]  |
| GAGGTTTTTTTAGCGGGGTTTTGCTCAGAAGCTG                | 35          | "core" staple | 2[202]  | 13[195] |
| AATATCAAACCCTCTTGAAAGGAATTGAAACAACCTAGTTAATTTGCA  | 49          | "core" staple | 22[125] | 18[119] |
| GAAACACCAGAACGAGTAGTAGTGAGAA                      | 28          | "core" staple | 4[62]   | 5[48]   |
| AGCTAAACAGGAGGAATTCGCATTAAT                       | 28          | "core" staple | 24[265] | 22[252] |
| AATTGCTGACGACGATAAAAATTTGCCAAGCGTCCACAGTTC        | 42          | "core" staple | 12[104] | 6[105]  |
| CTTGATATTCAACCTGAGAGTCTGGACCAAGGGATTTGACGA        | 42          | "core" staple | 18[244] | 25[244] |
| AAAGAAATTACATCGGGAGACGCTGAGACATAAAACAGAAAT        | 42          | "core" staple | 22[83]  | 22[84]  |
| AAGATTAGTATTCTGGCGGATAAGTGCCACTAATAACGGAAT        | 42          | "core" staple | 2[181]  | 13[181] |
| TTTGCCCGAACGCCCTGAAATGGATTACTAAATTTATGCGT         | 42          | "core" staple | 25[140] | 18[140] |



|                                                    |    |               |         |         |
|----------------------------------------------------|----|---------------|---------|---------|
| AAGGATTCTTATTGTCAGATAGCCGAACTGAATCCTTGCGG          | 42 | "core" staple | 0[216]  | 2[203]  |
| CCTCATTTTGTACAGAAAATACATACACATGAAAAACAGTT          | 42 | "core" staple | 3[238]  | 1[251]  |
| GCATAGTATCAGTTTCAGGAGGTTTAGTCTTAGAGTACCTTT         | 42 | "core" staple | 2[118]  | 12[105] |
| ATTTAACTCATTTTTTAACCAGGAACGCATTGCCGTTCTAG          | 42 | "core" staple | 22[223] | 18[224] |
| CGTAATCAGTAGCGAGAGCCAGCAAAATTTGAGCCATTTGGGACCAGCG  | 49 | "core" staple | 8[230]  | 11[223] |
| ATTAACGAGGCGCAAACGGTGATCAAGA                       | 28 | "core" staple | 8[90]   | 6[77]   |
| GAGGCTGCAAACGTAATCAATCAAAGGCACCGACCACAGTGCAGCAC    | 49 | "core" staple | 0[237]  | 8[231]  |
| AAACAGGACGTCAAAAATGAATTACAAATAGCCATATTTAACGGGAGCG  | 49 | "core" staple | 7[182]  | 9[174]  |
| AATACGTGGCACTGTATCTAAAAATTTACATTGGCGCGTAAG         | 42 | "core" staple | 22[146] | 22[147] |
| TTAACGATTGCCTTGATATTCTCATATGACGCAGT                | 35 | "core" staple | 2[216]  | 13[223] |
| TTCGAGGAATTGTAAGGAATTGCGAATAACAGTTTACCATCGGCTTGCA  | 49 | "core" staple | 8[41]   | 11[34]  |
| AAGACGGAGGAGTAAACAGGGCTTAAGCTA                     | 30 | "core" staple | 15[22]  | 14[18]  |
| GAGGAAACGCAAGGTAATTGAGAATCGCTATCTTAGGAAACC         | 42 | "core" staple | 12[181] | 12[182] |
| ACAGACATTAATTTCACTTTTGAAGGCCTTTGAG                 | 35 | "core" staple | 2[48]   | 13[55]  |
| ATGTTAGAGACTCCTTGAGTAACAGTGCAGGAGTGAATAAAT         | 42 | "core" staple | 13[224] | 3[237]  |
| CAATATCTATGGTGTAGCGGTACGGTGCTGACCTCTAA             | 42 | "core" staple | 17[238] | 15[251] |
| AATAAATTCGAGCTCAGGTACGACGAGTAGATTAGCCAGT           | 42 | "core" staple | 10[125] | 10[126] |
| CGGAGACTACTTCTCGGGCGCTAGGGCGGACAATGACGCAAGATGTG    | 47 | "core" staple | 17[217] | 36[226] |
| TATTACCGCCTTGCTGAAAAGAACATCC                       | 28 | "core" staple | 25[161] | 16[161] |
| TTTGGGGCTTGAATGAGAAGAGTCAATATACCTTTTTAACCT         | 42 | "core" staple | 27[98]  | 16[98]  |
| CATTTATATTATTGCACGGTTGGCAA                         | 28 | "core" staple | 24[90]  | 23[104] |
| ACTAATCGGTTTATTGACCACTTTGAACCGGATAAGGAACA          | 42 | "core" staple | 6[46]   | 6[47]   |
| TGATTGCAGTAACAGTACCTTTTGCCTACCTACCA                | 35 | "core" staple | 20[69]  | 23[76]  |
| GCACGTAGCGGTATGGTGCCGCGATCGGTGCGGGCCTCTATCACCAT    | 49 | "core" staple | 25[245] | 17[237] |
| ACCAGAACCGAAGCCAATGAAATAACCCACCCTGAACAAAGT         | 42 | "core" staple | 12[195] | 8[182]  |
| GGGAACAAGTAAACAACGCCATCAAAAATCCGATTAAGTTTGAGGCACCG | 49 | "core" staple | 21[238] | 18[245] |
| ACCCAAAAGTACCAAAGAACGCGAGGCGTGAAGCCGCTACAA         | 42 | "core" staple | 13[182] | 3[195]  |
| TTATCAATCCCATCCTCATTGAATCCCAGGTCTTTACCTGT          | 42 | "core" staple | 7[140]  | 7[139]  |
| AGTAATAAAAGGGACTCATGGGCGTTAAATAAGTT                | 35 | "core" staple | 23[175] | 19[195] |
| TTAACCTGCCTAATGAGTGCACCTGAGACAAAATCCCATGAT         | 42 | "core" staple | 18[48]  | 25[62]  |
| CTATTAGCCTGAAAAGATTACCCAGTCATGACGCTACCGACCGAAAAAG  | 49 | "core" staple | 21[154] | 18[161] |
| AGAGCCAAATCTACGTTAATACAGGACGGTGAATTCTGACGA         | 42 | "core" staple | 0[62]   | 4[63]   |
| GGGAGTTAAAGGCACTATCATGCCTCACAGCGGAAATTTGGGCTCTGTA  | 49 | "core" staple | 11[35]  | 4[28]   |
| GTTATTACATAAATACATAGCATCATTTCTCGAAGGCCACCCTGATT    | 49 | "core" staple | 16[83]  | 26[63]  |
| CTAAGTGCCTTACTGCGCGCTACAGGTAACGTG                  | 35 | "core" staple | 14[265] | 25[258] |
| TTTGCGGAGATGGTGCCCTCATAGTTAGCCAGTACGCAAGCCCAATAGG  | 49 | "core" staple | 12[41]  | 0[21]   |
| GTGTGATTGCGCATTGCGCGAACTGATAACAGAGATAGAACC         | 42 | "core" staple | 19[168] | 22[168] |
| AATGCCCTACATGGGAATGGAGAGCCGC                       | 28 | "core" staple | 1[252]  | 4[252]  |
| AGCACTAGGTGGGCTATCAAAAATAAATAAGCAATGTAAGCA         | 42 | "core" staple | 27[119] | 14[133] |
| CAGAGGGTAATTACAATAAACTGTACAGAGAGAATAACATAA         | 42 | "core" staple | 8[181]  | 7[181]  |
| CATTTGAATAAATCCCAACGTGGGCGATCTGACTAGAATC           | 42 | "core" staple | 17[49]  | 15[62]  |
| AATAATACAATAGATAAGTCCAACATGTTTCTGTC                | 35 | "core" staple | 6[153]  | 9[160]  |

|                                                   |    |               |         |         |
|---------------------------------------------------|----|---------------|---------|---------|
| GCTGAATACCGTACGAGATTTAGGAATAAAAGGAAGGGCACT        | 42 | "core" staple | 13[119] | 3[132]  |
| TATCAAATGTTTGGCGAATTATTCATTTCCAACAATAACGG         | 42 | "core" staple | 23[77]  | 20[77]  |
| GGGAGAGTAAGAAACGATTTTTATTATCAAGAAACCTTTTT         | 42 | "core" staple | 7[203]  | 11[202] |
| ATTAAATTTTTGTTGAGAAGGATCTACCCGAGAGGGTAGCATTCAA    | 49 | "core" staple | 23[196] | 17[202] |
| GTAGCAACCACCCTCATTTTCACAGAGGACCCGCT               | 35 | "core" staple | 1[49]   | 12[42]  |
| TGAAACCCGGCATTCCGGAACCAGAGCCGAGCCACTCACCGTGCGACAT | 49 | "core" staple | 8[251]  | 11[244] |
| AACGCCACCACATTGGAATAGGTGTATC                      | 28 | "core" staple | 2[139]  | 0[126]  |
| TAGAGCCTCAACAGAATCAATATCTGGTGCCAGCACGCCTGC        | 42 | "core" staple | 24[111] | 20[98]  |
| AGAAAAGGCTGGCTGACCTTCTACAGACCAGGCGCCAAAAAG        | 42 | "core" staple | 6[104]  | 8[91]   |
| ATCATTCTTTTATTAAGTTTCATTCCATCCAACGCTCAACAG        | 42 | "core" staple | 4[160]  | 11[160] |
| GCTTGCCACCTTATGTAATAATCATGAG                      | 28 | "core" staple | 4[76]   | 13[76]  |
| TAATAGTTTTACCACCTTTTGATAAGATCACTCATCTTTGCGGAAGCAA | 49 | "core" staple | 4[97]   | 11[104] |
| CAGACGAAACGCCAATCAATAATCGGAGAATAGCAGCCTTAACAAGAAA | 49 | "core" staple | 9[161]  | 6[154]  |
| ATCAGTTATTACCTTGTGAGTGAATAACCTTGCTTCGAATTT        | 42 | "core" staple | 26[62]  | 17[48]  |
| TAGAATTCATTACCCAAATCATGACAAGAAAGAGG               | 35 | "core" staple | 5[49]   | 7[69]   |
| CAGATATGGGTTGATATAAGTTTTAAATATGCAA                | 35 | "core" staple | 1[154]  | 13[160] |
| ACTCACACGCGCGGAGATGAATATACTTTGAATACAGCTA          | 42 | "core" staple | 20[48]  | 20[49]  |
| CAAAAGGAGCCTTTTGAATTTCAATGACAAGATAAATGTGTGCTTGCT  | 49 | "core" staple | 7[21]   | 8[42]   |
| TCAACCGTTTATTAAGCCACTTTTGATGATACACCGTATAGTATTAA   | 49 | "core" staple | 11[245] | 0[238]  |
| CATCGAGTTGATTCTGTAGCTCAACATGATAGCCCAACTAATGCAAAT  | 49 | "core" staple | 3[133]  | 1[153]  |
| TTTTATCAAAGTTGCATGATTAAGACTAGGATTAGAACCTCCCGGGGT  | 49 | "core" staple | 3[196]  | 1[216]  |
| AGAAAAGATTTTTGTTAAAATTCTGGCCAGCCGGTTGATAATC       | 42 | "core" staple | 21[196] | 21[195] |
| AAAGTAATCAGCTAATGCAGAACGCGCCTACCGACAAAAGGT        | 42 | "core" staple | 9[147]  | 9[146]  |
| AAAAGAAAAATCGGGAGTTGCTGCCCTTGAGCGGTTTGCCTTCGGC    | 47 | "core" staple | 26[48]  | 21[39]  |
| AGCTGATAGCAAGCCTGGGGTCACAATTCACACAACAT            | 39 | "core" staple | 23[35]  | 18[24]  |
| ACTCCAATCAAAGCCAAATATAAAGCGGATTGCATATACGAGAATGACC | 49 | "core" staple | 11[105] | 7[111]  |
| ATAAATCCAGAAGCCGCTTTTAGAGAATATAAAGCTGACTA         | 42 | "core" staple | 7[112]  | 8[126]  |
| GCTTTCCGGGACGCGTAACCGATTGACCGTAATG                | 35 | "core" staple | 18[258] | 21[265] |
| ACAGATGGACGGTCTGTTACTTAGCCGGTATACCAAAAGCTG        | 42 | "core" staple | 7[70]   | 5[83]   |
| AAGAAAAGTAAGTTAACAATAAAGAGCCCAATCCAACGCT          | 42 | "core" staple | 11[203] | 4[203]  |
| CAGACTGGAACCGCCTCCCTCAGAGCAATTTGCCTTTAGCGT        | 42 | "core" staple | 7[224]  | 7[223]  |
| AGAGCCGAAAATCATTCCGGTCATAGCCC                     | 28 | "core" staple | 5[252]  | 7[265]  |
| TTACCATTGAATTACACCCTCCGCCAGCATTGACA               | 35 | "core" staple | 9[245]  | 4[238]  |
| AAACCAAGTACCCTGTCATAAATATTAA                      | 28 | "core" staple | 4[139]  | 5[139]  |
| ATAATCCATTATCAAGATAACTATATGTAAGATGA               | 35 | "core" staple | 25[77]  | 18[84]  |
| GCTGCATTAATGAAATTGGGCGGGCAAC                      | 28 | "core" staple | 21[21]  | 23[34]  |
| TCGGAACGAACCCTCAGCTGAGCCCACGCATA                  | 33 | "core" staple | 13[19]  | 10[18]  |
| TACCAGTAAACGAAGAACCGCCACCCTC                      | 28 | "core" staple | 2[76]   | 0[63]   |
| TAAAGCATGAGGCGGTCAGTATATATTTAATAGAT               | 35 | "core" staple | 21[119] | 24[112] |
| GTGAAATAGATAGGCACTATTAAGAACAATGAGTCGCTATT         | 42 | "core" staple | 17[28]  | 15[41]  |
| ATTGTCACCAGGGTTTTCCCATGTAATAACAGG                 | 33 | "core" staple | 14[244] | 37[249] |
| GTGAGCGAACGCGGTGCATCTGGCAAACAAGAGATCTCCGT         | 42 | "core" staple | 22[251] | 21[237] |

|                                                              |                    |                |              |            |
|--------------------------------------------------------------|--------------------|----------------|--------------|------------|
| GTAATCTACGTAACAGCGCGAAGAATACACTAAAATAAACGG                   | 42                 | "core" staple  | 6[76]        | 12[77]     |
| CTTGAAACAATATATTTTTAAAGAAAACAATCGC                           | 35                 | "core" staple  | 15[63]       | 19[69]     |
| CCCAATAGCAAGCAAAGCCGTCAAGAACGCATGTAGAAACCAACATGTA            | 49                 | "core" staple  | 2[160]       | 10[154]    |
| CATTAATTGCGTTGCGGTAAAGCGGTCCACGCTGGTT                        | 37                 | "core" staple  | 21[40]       | 24[21]     |
| AATAAATTAAGCTGACAGTGCGGCCCTCCCGATATTTATT                     | 42                 | "core" staple  | 16[160]      | 26[147]    |
| AGATTGTATAAGATATCGATGAACGGTAATCAGGTGTACGCC                   | 42                 | "core" staple  | 21[217]      | 24[217]    |
| CGTGGCGGCTCGCCTTATGACCCTGTAATGCCTGA                          | 35                 | "core" staple  | 27[182]      | 16[189]    |
| CAGGAAAGTAGAAGACGTGTAGGTAAGTAAATAA                           | 35                 | "core" staple  | 25[182]      | 18[189]    |
| GTAGCAAAGTCAAAAAATTTTAGAACCCCTCATAGAAAGGC                    | 42                 | "core" staple  | 26[230]      | 17[216]    |
| GACTCTAGGAAAGCACTATCGGCCAGCCTACATTTACAGACC                   | 42                 | "core" staple  | 14[174]      | 23[174]    |
| TTGACGGTGATACCAATCGGTTGTACCTAGCATTGTGGCATATTACTA             | 49                 | "core" staple  | 27[161]      | 18[168]    |
| TCTAGCTGGCGAGGAGAAGCGACGGC                                   | 26                 | "core" staple  | 36[249]      | 38[238]    |
| TAAATGAATTTTTGGATCGTCGGGTAGC                                 | 28                 | "core" staple  | 3[21]        | 13[34]     |
| GTAATTAATAGTAGAAAAACTGGAGT                                   | 28                 | "core" staple  | 16[188]      | 14[175]    |
| CGAGCTTTCTCAAAGGGGGGATTTCGCTATTACG                           | 33                 | "core" staple  | 37[226]      | 15[244]    |
| CAGTGCCGGTAACGACCTTATCGGCAATGCCGT                            | 35                 | "core" staple  | 38[237]      | 26[231]    |
| <b>Right-handed structures only</b>                          |                    |                |              |            |
| AAGCCTTATTTTCATCCCGCCAAAATAAAAAGGAGTTGATTAAGAGTC             | 49                 | "core" staple  | 15[210]      | 25[216]    |
| <b>Left-handed structures only</b>                           |                    |                |              |            |
| AGGGAACCGAACACGAAATCCGCGACCTACAACG                           | 35                 | "core" staple  | 8[62]        | 10[56]     |
|                                                              |                    |                |              |            |
| <b>Modified staples and Azo modified oligos<sup>1</sup></b>  |                    |                |              |            |
|                                                              | <b>Length (nt)</b> |                | <b>Start</b> | <b>End</b> |
| CGGATGGACCGCCAAGGTAGAAAGATTCAAGAGCAACACTAT AAAAAAAAAA        | 52                 | nanorod handle | 13[98]       | 2[98]      |
| AACAGTGCATTACGATAATTTAGAA AAAAAAAAAA                         | 38                 | nanorod handle | 20[97]       | 25[97]     |
| CTAATATCAGAGAGATAGCAAATAAACACAGAGCC AAAAAAAAAA               | 45                 | nanorod handle | 9[175]       | 4[182]     |
| AAGACAAAGAACGCGAGAAGAGCAAAAGAAATGCTCCAGAAGCAAGTTT AAAAAAAAAA | 59                 | nanorod handle | 18[118]      | 27[97]     |
| TAGGGCTGTCTGGTTCATCGTAGGATGCCCTGTCTTTCCTT AAAAAAAAAA         | 52                 | nanorod handle | 11[161]      | 4[161]     |
| GTATTAGGAAACCAGATGCAATCCAATCGCAATGTTTTGCGGCCGTAA AAAAAAAAAA  | 59                 | nanorod handle | 25[98]       | 27[118]    |
| GAAGTTTACCCTACTAACGGAACAACACTACTGGCTCATT AAAAAAAAAA          | 52                 | nanorod handle | 13[77]       | 2[77]      |
| CTAAAGTGTGAGAGAAGGCTTATCCGGTATCATTACCGCG AAAAAAAAAA          | 52                 | nanorod handle | 13[161]      | 2[161]     |
| TGAAACAAACATCATGGAACTCATATTTACGTGA AAAAAAAAAA                | 45                 | nanorod handle | 18[83]       | 27[76]     |
| AGCCCGAAAGACTTGAACCAGACTGGATGAGGGGG AAAAAAAAAA               | 45                 | nanorod handle | 9[91]        | 4[98]      |
| CCTGTTTCGCGAGCTGGTAATTTAGAGC AAAAAAAAAA                      | 38                 | nanorod handle | 18[160]      | 27[160]    |
| TTATAGTAAAAATCCTCAATGCTTTAAATACTGCGGAATCTTTGCAA AAAAAAAAAA   | 59                 | nanorod handle | 8[125]       | 4[119]     |
| ATTCGCCGAGAGGATTATACCATCAAT AAAAAAAAAA                       | 38                 | nanorod handle | 20[76]       | 25[76]     |
| GCGATTTAAGACGAATCAGTGAATAAG AAAAAAAAAA                       | 38                 | nanorod handle | 3[77]        | 4[77]      |
| TCATATGTACCCCTAAAACAAAATAAGAAATACCATTGCAA AAAAAAAAAA         | 52                 | nanorod handle | 20[195]      | 25[181]    |
| TAATTTGCTATTTTGCACCCATTAATC AAAAAAAAAA                       | 38                 | nanorod handle | 4[181]       | 2[182]     |
| TAGCACAACCTGTTAGCTATAAAGTTTACCCTAA AAAAAAAAAA                | 45                 | nanorod handle | 16[132]      | 27[139]    |

|                                                                                  |    |                |         |         |
|----------------------------------------------------------------------------------|----|----------------|---------|---------|
| CTTCTGATCTTTAATAAAAAATACCGAACTTGAATCAATCGTAGAACAA<br>AAAAAAAAAA                  | 59 | nanorod handle | 22[167] | 25[160] |
| ACACCGGAATCATACAATTCTAACTCAACGGCGAA AAAAAAAAAA                                   | 45 | nanorod handle | 18[188] | 27[181] |
| ATTTTCGAGACCAGTATAAAGATAACAGAACAAGCGATACAT AAAAAAAAAA                            | 52 | nanorod handle | 10[139] | 2[140]  |
| ATTTAGGCAGAGGCTTTACGAGGGTATT AAAAAAAAAA                                          | 38 | nanorod handle | 10[153] | 4[140]  |
| TAGGGGCTCGAGGTGAACAAAACCTTACAAACAAT AAAAAAAAAA                                   | 45 | nanorod handle | 14[111] | 25[118] |
| ATAATGCCAATTCTGCGAATAGCGAGATTACGAG AAAAAAAAAA                                    | 45 | nanorod handle | 13[126] | 2[119]  |
| ATATTTTCAGCAGAAGATAAATTCTGACTCTTAGTAAATCC AAAAAAAAAA                             | 52 | nanorod handle | 21[140] | 25[139] |
|                                                                                  |    |                |         |         |
| <b>Right handed</b>                                                              |    |                |         |         |
| GACTAAAGACTTTTACGTAATAGGCAAAAACAAAGTGCTCCAAATCATA--<br>-tt GCATGTTTCGCTCGCTAGGTT | 71 |                | 13[56]  | 8[63]   |
| CTGATAAATTAATGAAAGGCTATCGTAAAACAGGA--<br>-ttt-S-S-CGTXTAXGXTCA                   |    | RH Azo-ODN 1   | 18[223] | 21[216] |
| TGXAACTXAA XCG -S-S-ttt AAC CTA GCG AGC GAA CAT GC                               |    | RH Azo-ODN 2   |         |         |
| <b>Left handed</b>                                                               |    |                |         |         |
| CATCACTAAGGGAAGAAAGCGCCCGCTGCGGGAG--<br>-tt CACACAGTAGATCAGAATTG                 | 57 |                | 26[202] | 15[209] |
| CAAATTAAGTGAACACAAGAATTGAGTTAAGCCTTACAGAAT--<br>-ttt-S-S-CGTXTAXGXTCA            |    | LH Azo-ODN 1   | 8[209]  | 8[210]  |
| TGXAACTXAA XCG -S-S-ttt CAA TTC TGA TCT ACT GTG TG                               |    | LH Azo-ODN 2   |         |         |

<sup>1</sup> Modifications introduced to the staple strands are highlighted with bold fonts.  
Thymines used as spacers are highlighted with the lowercase font, t.

**Supplementary Table 2. Thermal annealing temperatures and times for DNA origami folding.**

| <b>Temperature, °C</b> | <b>Time, min</b> |
|------------------------|------------------|
| 80                     | 15               |
| 79, 78, ..., 72, 71    | 1                |
| 70, 69, 68             | 5                |
| 67, 66, 65, 64, 63     | 10               |
| 62                     | 15               |
| 61                     | 20               |
| 60                     | 30               |
| 59, 58, ..., 39, 38    | 60               |
| 37, 36                 | 45               |
| 35                     | 30               |
| 34                     | 20               |
| 33, 32                 | 10               |
| 31, 30, ..., 26, 25    | 5                |
| 24, 23, 22, 21         | 2                |
| 20                     | Hold             |



## Supplementary Methods

### Design of the DNA origami templates

The DNA origami template structures were designed using caDNA software<sup>1</sup>. The origami template consists of two 14-helix bundles (80 nm × 16 nm × 8 nm) linked together by the scaffold crossing over twice between them at one position (Supplementary Fig. 1). The two crossings have an 8 nt region of the unfolded scaffold, which serves as a spacer. Twelve binding sites along two parallel lines are extended from each origami bundle for robust assembly of one AuNR (see Supplementary Fig. 2). The length of the two lines (~36 nm) is designed to match the length of the AuNRs (38 nm). The distance between the two lines is ~4.4 nm.

The DNA origami template structures were functionalized with additional ssDNA strands with azobenzene modifications for controlled light-induced conformation switching. Specifically, the structures can be switched between the relaxed and left-handed configurations, or the relaxed and right-handed configurations.

### Azobenzene-modified DNA strands

Four DNA strands modified with azobenzene modification were used (RH Azo-ODN 1, RH Azo-ODN 2 for the right-handed and LH Azo-ODN 1, LH Azo-ODN 2 for the left-handed configuration, see Supplementary Table 1 and Supplementary Fig. 3). These four strands were obtained from two azobenzene-modified segments (Azo-ODN 1 and Azo-ODN 2) linked to four different single-stranded DNA strands through disulfide following the previously described procedure<sup>2,3</sup>. RH Azo-ODN 1 and LH Azo-ODN 1 were linked to the staple strands, whereas RH Azo-ODN 2 and LH Azo-ODN 2 were linked to the DNA strands which constitute part of the double-stranded branch linking the two DNA origami bundles together into the locked configuration (see Supplementary Fig. 3).

Azo-ODN 1 and Azo-ODN 2 contain three and four azobenzene modifications, respectively. Multiple azobenzene modifications are required for efficient photoregulation of DNA hybridization<sup>4,5</sup>.

### Folding of the DNA origami template structures

For preparing the DNA origami template structures, the sample prepared for thermal annealing contained: 10 nM of the p7650 scaffold, 100 nM of each unmodified staple, 30 nM of the modified staples 13[56]-8[63]/26[202]-15[209] for the right-/left-handed structures, and 50 nM of Azo-ODN 1, Azo-ODN 2 modified staples and oligos. All DNA strands were mixed in 1x TE buffer (10 mM Tris, 1 mM EDTA, pH 8) together with 20 mM of MgCl<sub>2</sub> and 5 mM of NaCl. The mixture was then exposed to a thermal annealing ramp; first heated up to 80°C for 15 min, then slowly cooled down to 20°C (see Supplementary Table 2).

### Purification of DNA origami structures

The DNA origami template structures were purified by gel electrophoresis (Supplementary Fig. 4). After annealing, the sample contained DNA origami structures in both “relaxed” and “closed” states. To purify structures in “closed” state from those in “relaxed” and extra free staples, we ran a 2.5% agarose gel in a 0.5 x TBE buffer with 11 mM MgCl<sub>2</sub>. After staining with Sybr Gold (Invitrogen), favored band (labelled as “origami structures in “closed state” in Supplementary Fig. 4) was cut out and the DNA origami template structures were extracted with Freeze `N Squeeze spin columns (BioRad).

The concentration of the origami structures after purification was estimated using UV-Vis absorption spectroscopy. For estimation, we used an extinction coefficient of 1.3 M<sup>-1</sup>cm<sup>-1</sup> at 260 nm. The purified templates in “closed” state were later used for AuNR assembly. TEM images of the purified DNA origami template structures are shown in Supplementary Fig. 5.

## Functionalization of the AuNRs with DNA

Functionalization of the AuNRs with thiolated DNA (SH-5' T<sub>16</sub>, biomers.net) was carried out following the low pH route<sup>6,7</sup>. One milliliter of 1 nM AuNRs was mixed with 50  $\mu$ L of 1% sodium dodecyl sulfate (SDS), 100  $\mu$ L of 10X TBE, and 5  $\mu$ L of 1mM DNA. Hydrochloric acid (HCl) was used to adjust the pH value of the solution to 3. Before being added to the AuNR solution, thiolated DNA strands were incubated with Tris(carboxyethyl) phosphine hydrochloride (TCEP) for at least 30 min in order to reduce the disulfide bonds.

After incubation of the AuNRs with DNA for 1 hour, 0.5 M NaCl was added to the solution. The solution was then gently shaken for at least 3 hours. During this step, the solution became slightly cloudy due to the fact that cetrimonium bromide (CTAB) was replaced from the surface of the AuNRs by thiolated DNA. Upon being warmed up to  $\sim 35^\circ\text{C}$  for 5 min, the solution became clear again.

The AuNRs covered with DNA were purified from free DNA strands through centrifugation. At least 4 centrifugation steps were used (6000 rcf, 20 min). Each time, the supernatant was carefully removed and the AuNRs were re-suspended in 0.5x TBE buffer containing 0.03% of SDS. The final concentration of the AuNRs was estimated with UV-Vis absorption spectroscopy using extinction coefficient of  $9.5 \times 10^8 \text{ M}^{-1} \text{ cm}^{-1}$  for the longitudinal plasmon resonance of the AuNRs (see Supplementary Fig. 15). We used AuNRs with dimensions of 10 nm x 38 nm as specified by supplier (Sigma-Aldrich, cat no. 716812). By utilization of AuNRs of smaller sizes or silver enhancement<sup>8</sup>, the CD response of our plasmonic nanostructures can be shifted to shorter wavelengths.

## Assembly of the AuNRs on the DNA origami template structures

The purified AuNRs were added to the purified DNA origami template structures in an excess of 10 AuNRs per DNA origami structure. The mixture was annealed from  $40^\circ\text{C}$  to  $20^\circ\text{C}$  over 15 hours. Additional annealing was crucial for achieving high yield of AuNR assembly. In contrast to our previous work<sup>9</sup>, we used slightly longer AuNR capture strands (A<sub>10</sub> instead of A<sub>8</sub>) on DNA origami structures in order to ensure stable attachment of nanorods at  $40^\circ\text{C}$  used during CD characterization.

After thermal annealing, second agarose gel purification step (0.5% agarose gel in 0.5x TBE buffer with 11 mM MgCl<sub>2</sub>) was used to separate the origami template structures assembled with two AuNRs from the AuNR excess as well as agglomerates containing a higher number of AuNRs and origami template structures. As shown in Supplementary Fig. 13, the band of the AuNR dimers on DNA origami was nicely separated from other products. This band was cut out from the gel. Then the structures were extracted with Freeze 'N' Squeeze spin columns (BioRad) and used in CD measurements.

## UV-Vis and CD characterization

CD and UV-Vis characterization was performed with a J-815 Circular Dichroism Spectrometer (Jasco) using Quartz SUPRASIL cuvettes (105.203-QS, Hellma Analytics) with a path length of 10 mm. Complementary UV-Vis characterization was performed with BioSpectrometer (Eppendorf).

In general, the CD signal increases linearly with the sample concentration. To obtain a good signal to noise ratio, we performed the measurements at concentrations corresponding to absorption values in the range of 0.2 – 0.5 at the longitudinal plasmonic resonance.

For CD characterization of the conformational switching, a 80  $\mu$ L solution containing  $\sim 0.2$  nM of the AuNR dimers was used. The absorption was  $\sim 0.4$  at the longitudinal plasmon resonance. To ensure good switching efficiency, reliable functionality of the DNA assemblies and simultaneously avoid origami damage, the sample was kept at a temperature of  $40^\circ\text{C}$  and pH 8 during the CD characterization. During the CD measurements, the cuvette was closed with a transparent lid to prevent solution evaporation.

Experiments on monitoring the conformational switching (Fig. 3d in the main text) were performed in the following way. The CD spectrometer was set to the time scan acquisition mode with a monitoring wavelength of 720 nm and a data pitch of 1 second. During UV/VIS light illumination the shutter of the CD spectrometer was closed. CD levels were measured for about 10 seconds with light UV /VIS illumination being switched off. Data points in Fig. 3d in the main text represent the mean value of measured CD.

Reversibility of the conformational switching (Fig. 4b in the main text and Supplementary Fig. 16 c,f) was examined by alternative UV and VIS light illumination in cycles for 15 and 10 min per exposure, respectively. After illumination, the CD signal was measured at 720 nm for about 1 min using the time scan acquisition mode of the CD spectrometer. Data points in Fig. 4b in the main text and Supplementary Figs. 16c,f represent the mean value of measured CD.

## Theoretical calculations

Theoretical calculations were performed using commercial software COMSOL Multiphysics based on a finite element method. The origin of the bisignate CD in the plasmonic cross configuration is a consequence of interaction between the plasmons excited in the two AuNRs<sup>10,11</sup>. The CD signal was calculated as a difference in extinction for the left- and right-circularly polarized light. Since the plasmonic assemblies were dispersed in a solution, we carried out orientational averaging<sup>12</sup>. Averaging over all possible orientations at defined light incidence is equivalent to averaging over all incident directions of light for a nanostructure with defined orientation. It has been demonstrated both analytically and numerically<sup>13,14</sup> that averaging over six orthogonal directions of light incidence is sufficient to give accurate CD. In order to account for the inhomogeneous broadening due to the polydispersity of the AuNRs, the experimental dielectric function of Au was modified by including an additional term:

$$\epsilon_{\text{effective}}(\omega) = \epsilon_{\text{bulk}}(\omega) + \epsilon_{\text{correction}}(\omega), \quad (1)$$

where the dielectric function of bulk Au,  $\epsilon_{\text{bulk}}$  is from Ref. 15, and the correction term is introduced following a standard approach<sup>16</sup>

$$\epsilon_{\text{correction}}(\omega) = \frac{\omega_p^2}{\omega^2 + i\omega\gamma} - \frac{\omega_p^2}{\omega^2 + i\omega\Gamma_{\text{broad}}}. \quad (2)$$

The  $\omega_p = 8.754 \text{ eV}$  and  $\gamma = 0.0724 \text{ eV}$  are the Drude parameters, respectively.  $\Gamma_{\text{broad}}$  is  $0.290 \text{ eV}$ .

## Supplementary References

1. Douglas, S. M. *et al.* Rapid prototyping of 3D DNA-origami shapes with caDNAno. *Nucleic Acids Res.* **37**, 5001–5006 (2009).
2. Endo, M., Yang, Y., Suzuki, Y., Hidaka, K. & Sugiyama, H. Single-molecule visualization of the hybridization and dissociation of photoresponsive oligonucleotides and their reversible switching behavior in a DNA nanostructure. *Angew. Chem. Int. Ed.* **51**, 10518–10522 (2012).
3. Yang, Y., Endo, M., Hidaka, K. & Sugiyama, H. Photo-controllable DNA origami nanostructures assembling into predesigned multiorientational patterns. *J. Am. Chem. Soc.* **134**, 20645–20653 (2012).
4. Liang, X., Mochizuki, T. & Asanuma, H. A supra-photoswitch involving sandwiched DNA base pairs and azobenzenes for light-driven nanostructures and nanodevices. *Small* **5**, 1761–1768 (2009).
5. Kamiya, Y. & Asanuma, H. Light-driven DNA nanomachine with a photoresponsive molecular engine. *Accounts Chem. Res.* **47**, 1663–1672 (2014).

6. Zhang, X., Servos, M. R. & Liu, J. Instantaneous and quantitative functionalization of gold nanoparticles with thiolated DNA using a pH-assisted and surfactant-free route. *J. Am. Chem. Soc.* **134**, 7266–7269 (2012).
7. Shi, D., Song, C., Jiang, Q., Wang, Z.-G. & Ding, B. A facile and efficient method to modify gold nanorods with thiolated DNA at a low pH value. *Chem. Commun.* **49**, 2533–2535 (2013).
8. Kuzyk, A. *et al.* DNA-based self-assembly of chiral plasmonic nanostructures with tailored optical response. *Nature* **483**, 311–314 (2012).
9. Kuzyk, A. *et al.* Reconfigurable 3D plasmonic metamolecules. *Nat. Mater.* **13**, 862–866 (2014).
10. Augu  , B., Alonso-G  mez, J. L., Guerrero-Mart  nez, A. & Liz-Marz  n, L. M. Fingers crossed: optical activity of a chiral dimer of plasmonic nanorods. *J. Phys. Chem. Lett.* **2**, 846–851 (2011).
11. Guerrero-Mart  nez, A. *et al.* Intense optical activity from three-dimensional chiral ordering of plasmonic nanoantennas. *Angew. Chem. Int. Ed.* **50**, 5499–5503 (2011).
12. Fan, Z. & Govorov, A. O. Plasmonic circular dichroism of chiral metal nanoparticle assemblies. *Nano Lett.* **10**, 2580–2587 (2010).
13. Fan, Z. & Govorov, A. O. Chiral nanocrystals: plasmonic spectra and circular dichroism. *Nano Lett.* **12**, 3283–3289 (2012).
14. Fasman, G. D. *Circular dichroism and the conformational analysis of biomolecules*. (Springer, 1996).
15. Johnson, P. B. & Christy, R. W. Optical constants of the noble metals. *Phys. Rev. B* **6**, 4370–4379 (1972).
16. Kreibig, U. & Vollmer, M. *Optical properties of metal clusters*. (Springer, 1995).
